# Supplementary material for: Synthesis and characterisation of fluorinated epitaxial films of BaFeO2F: tailoring magnetic anisotropyviaa lowering of tetragonal distortion
Source: Royal Society of Chemistry journal article supplement (doi:10.1039/c9ra08039b), 2019-01-01
Supplement: c9ra08039b1.pdf [file c9ra08039b1.pdf]

**Supplementary Material for**  
**Synthesis and characterisation of fluorinated epitaxial films of**  
**BaFeO<sub>2</sub>F: Tailoring magnetic anisotropy via a lowering of**  
**tetragonal distortion**

Akash Nair <sup>a</sup>, Stephan Wollstadt <sup>a</sup>, Ralf Witte<sup>b</sup>, Supratik Dasgupta <sup>c</sup>, Philipp Kehne <sup>c</sup>, Lambert Alff <sup>c</sup>, Philipp Komissinskiy <sup>c,\*</sup>, Oliver Clemens <sup>a,b,\*</sup>

<sup>a</sup> Technische Universität Darmstadt, Institut für Materialwissenschaft, Fachgebiet Materialdesign durch Synthese, Alarich-Weiss-Straße 2, 64287 Darmstadt, Germany.

<sup>b</sup> Karlsruher Institut für Technologie, Institut für Nanotechnologie, Hermann-von-Helmholtz-Platz 1, 76344 Eggenstein Leopoldshafen, Germany.

<sup>c</sup> Technische Universität Darmstadt, Institut für Materialwissenschaft, Fachgebiet Dünne Schichten, Alarich-Weiss-Straße 2, 64287 Darmstadt, Germany

\* Corresponding Authors:

Fax: +49 6151 16 20699

E-Mail: [komissinskiy@oxide.tu-darmstadt.de](mailto:komissinskiy@oxide.tu-darmstadt.de)

Fax: +49 6151 16 21991

E-Mail: [oliver.clemens@md.tu-darmstadt.de](mailto:oliver.clemens@md.tu-darmstadt.de)

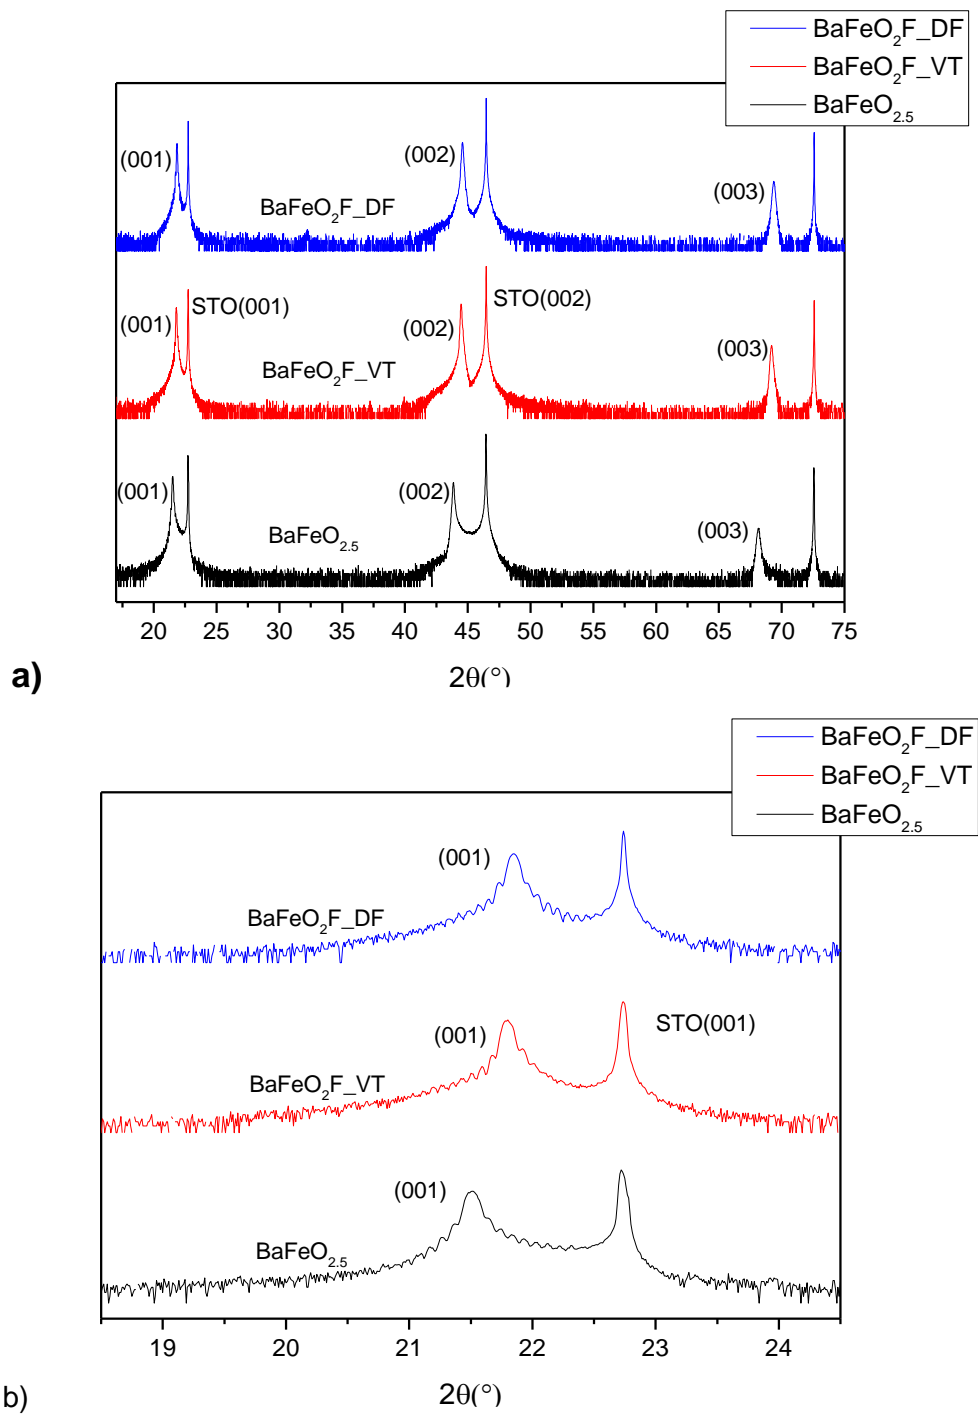

Figure S 1. a) XRD  $2\theta$ - $\theta$  patterns of the BFO film and BFOF films on STO. b) Expanded view of the 001 reflection.

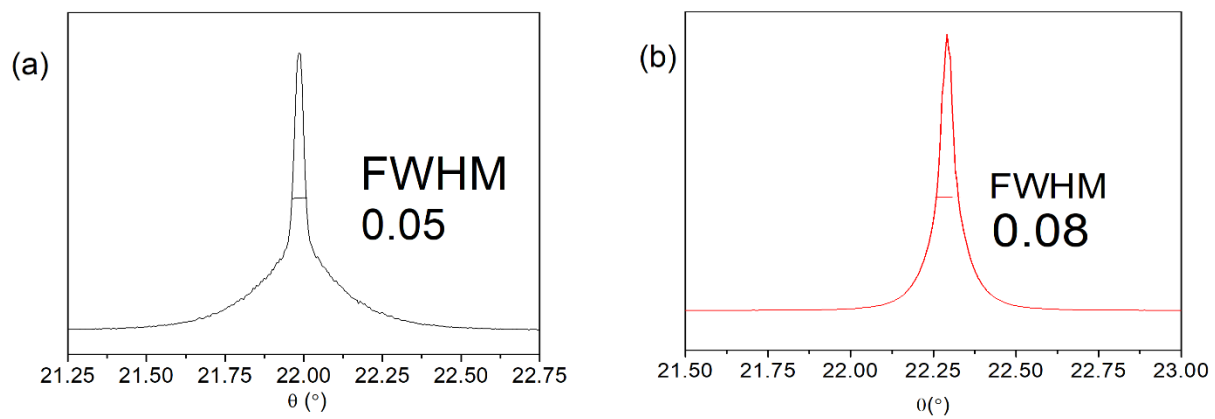

Figure S 2. Rocking curve scans of the (002) reflection of a film of BFO (a) and BFOF (b).

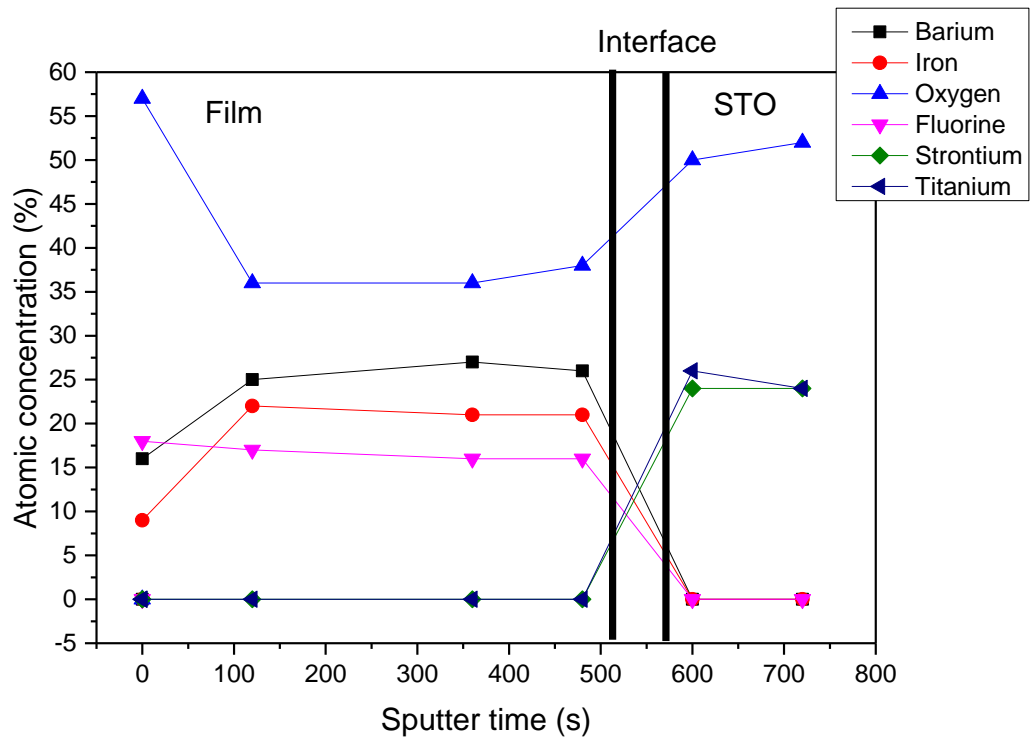

Figure S 3. Normalized concentration-depth profile for BFOF\_VT.
